# Supplementary material for: Lightweight Vapor-Permeable Plasters for Building Repair Detailed Experimental Analysis of the Functional Properties
Source: MDPI journal article supplement (doi:10.3390/ma14102613), 2021-05-17
Supplement: s1 [file s1]

# Lightweight Vapor-Permeable Plasters for Building Repair Detailed Experimental Analysis of the Functional Properties

Martina Záleská<sup>1</sup>, Milena Pavlíková<sup>1</sup>, Adam Pivák<sup>1</sup>, Anna-Marie Lauermannová<sup>2</sup>, Ondřej Jankovský<sup>2</sup> and Zbyšek Pavlík<sup>1,\*</sup>

<sup>1</sup> Department of Materials Engineering and Chemistry, Faculty of Civil Engineering, Czech Technical University in Prague, Thákurova 7, 166 29 Prague 6, Czech Republic; martina.zaleska@fsv.cvut.cz (M.Z.); milena.pavlikova@fsv.cvut.cz (M.P.); adam.pivak@fsv.cvut.cz (A.P.)

<sup>2</sup> Department of Inorganic Chemistry, Faculty of Chemical Technology, University of Chemistry and Technology, Technická 5, 166 28 Prague 6, Czech Republic; anna-marie.lauermannova@vscht.cz (A.-M.L.); ondrej.jankovsky@vscht.cz (O.J.)

\* Correspondence: pavlikz@fsv.cvut.cz; Tel.: +420-224-354-371

**Citation:** Záleská, M.; Pavlíková, M.; Pivák, A.; Lauermannová, A.-M.; Jankovský, O.; Pavlík, Z. Lightweight Vapor-Permeable Plasters for Building Repair Detailed Experimental Analysis of the Functional Properties. *Materials* **2021**, *14*, 2613. <https://doi.org/10.3390/ma14102613>

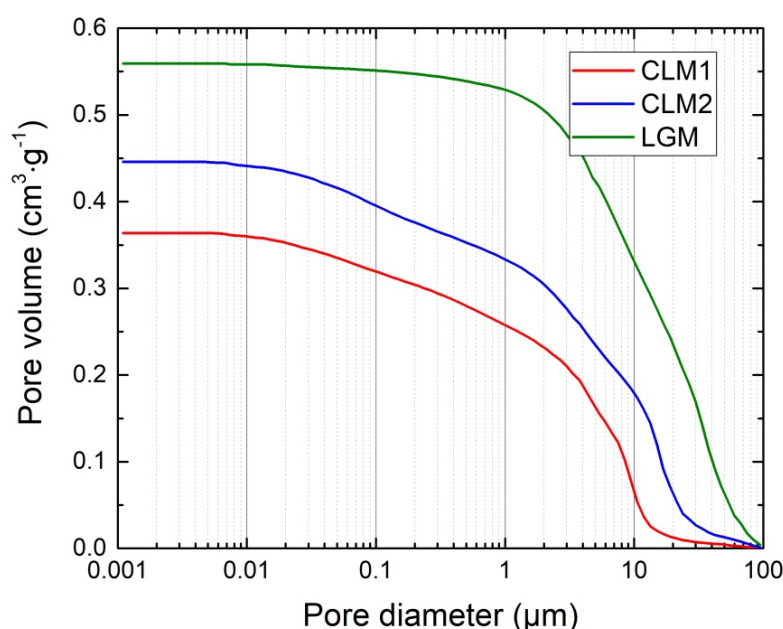

**Figure S1.** Cumulative pore volume distribution of the researched plasters.

Academic Editor: Neven Ukrainczyk

Received: 22 April 2021

Accepted: 14 May 2021

Published: 17 May 2021

**Publisher's Note:** MDPI stays neutral with regard to jurisdictional claims in published maps and institutional affiliations.

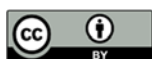

**Copyright:** © 2021 by the authors. Submitted for possible open access publication under the terms and conditions of the Creative Commons Attribution (CC BY) license (<http://creativecommons.org/licenses/by/4.0/>).

**Table S1.** The pore size distribution parameters.

| Pore Diameter<br>Range<br>( $\mu\text{m}$ ) | Relative Volume<br>( $\text{cm}^3\cdot\text{g}^{-1}$ ) |         |         | Relative Volume<br>(%) |       |       | Porosity<br>(%) |        |        |
|---------------------------------------------|--------------------------------------------------------|---------|---------|------------------------|-------|-------|-----------------|--------|--------|
|                                             | CLM1                                                   | CLM2    | LGM     | CLM1                   | CLM2  | LGM   | CLM1            | CLM2   | LGM    |
| 100–10                                      | 0.05342                                                | 0.17374 | 0.32328 | 14.67                  | 38.87 | 57.31 | 7.136           | 21.004 | 34.251 |
| 10–1.0                                      | 0.25587                                                | 0.33153 | 0.52763 | 55.58                  | 35.3  | 36.22 | 27.044          | 19.076 | 21.65  |
| 1.0–0.1                                     | 0.31811                                                | 0.39369 | 0.55093 | 17.09                  | 13.91 | 4.13  | 8.314           | 7.514  | 2.469  |
| 0.1–0.001                                   | 0.35946                                                | 0.44068 | 0.55831 | 11.35                  | 10.51 | 1.31  | 5.523           | 5.681  | 0.782  |
| 0.001–0.0010                                | 0.3637                                                 | 0.44579 | 0.55938 | 1.16                   | 1.15  | 0.19  | 0.566           | 0.619  | 0.113  |

**a) CLM 1 – 0 cycles, water, NaCl, Na<sub>2</sub>SO<sub>4</sub>**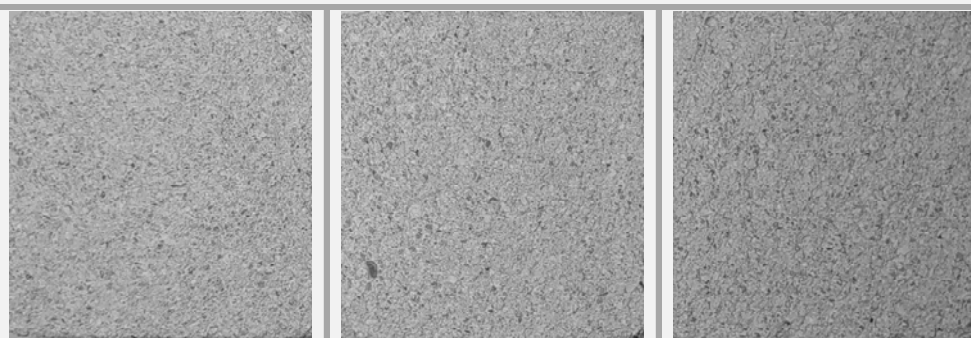**CLM 1 – 10 cycles, water, NaCl, Na<sub>2</sub>SO<sub>4</sub>**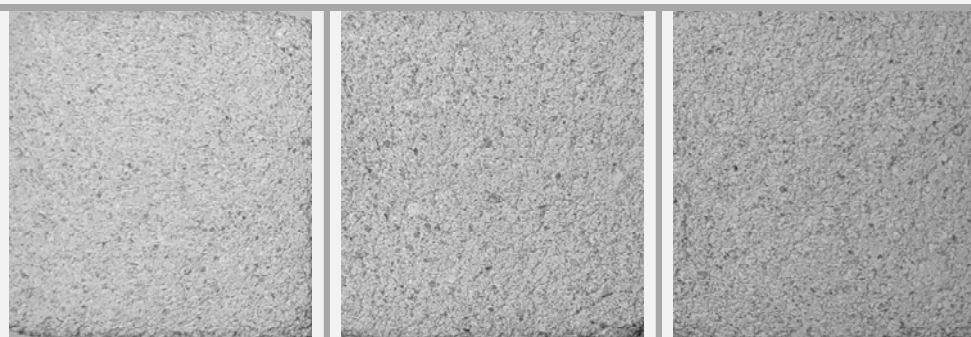

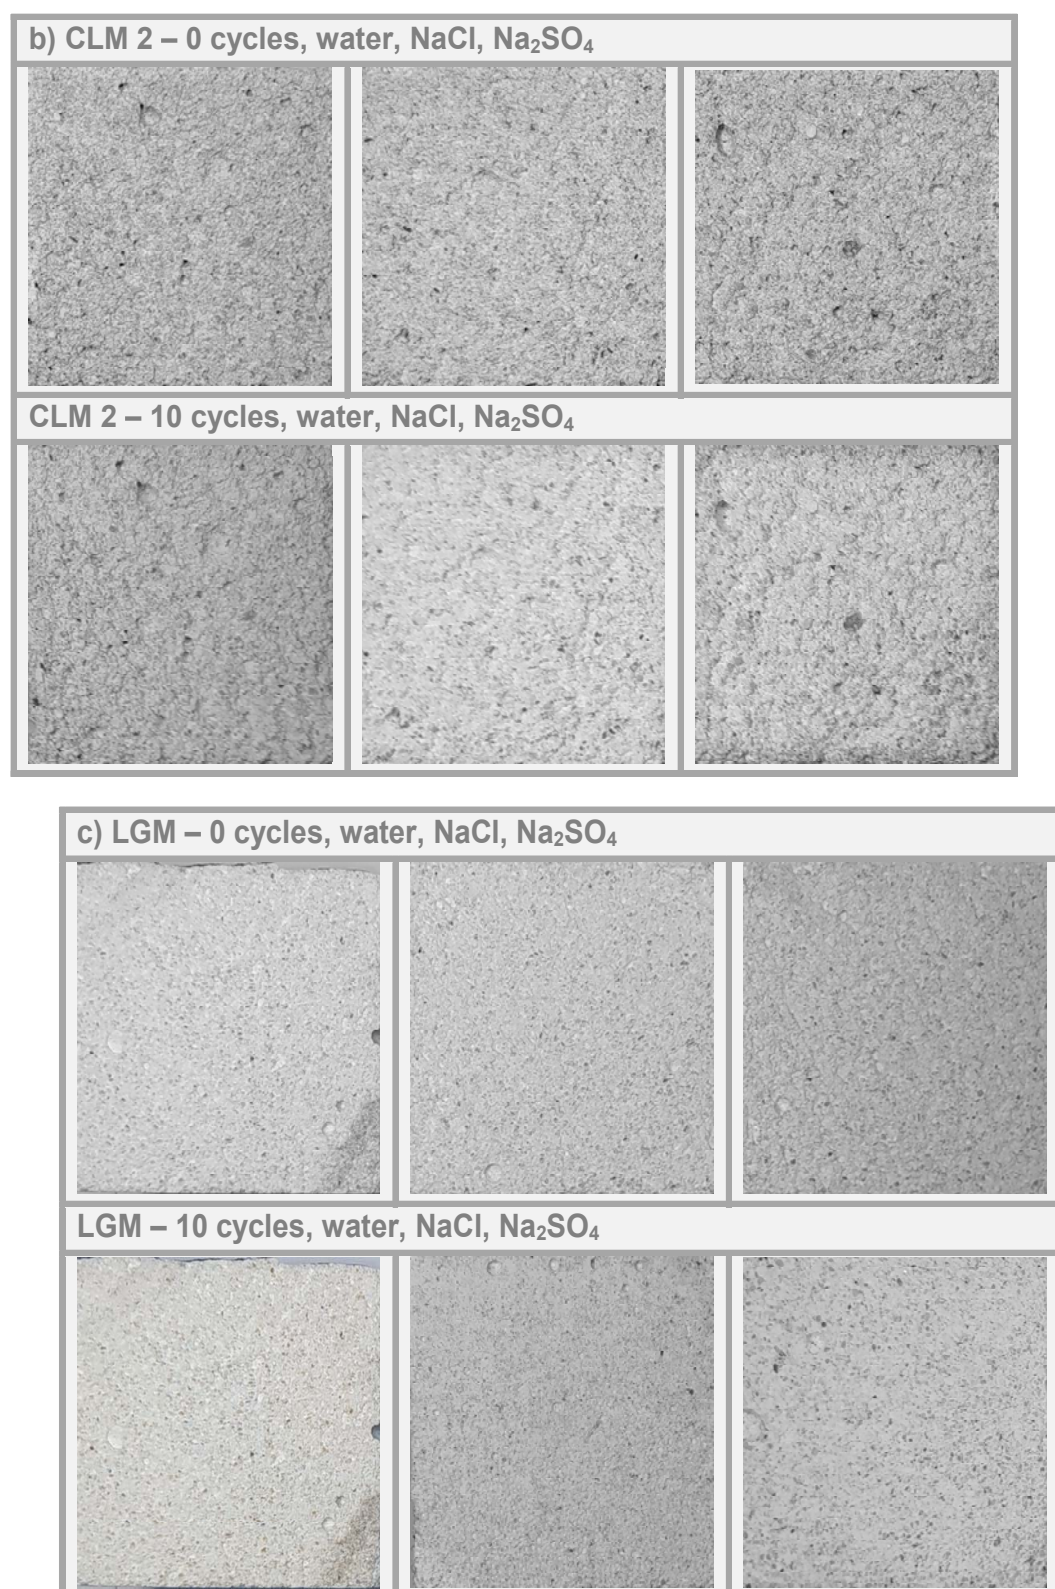

**Figure S2.** Photos of the researched plasters before and after salt crystallization test: (a) Plaster CLM1; (b) Plaster CLM2; (c) Plaster LGM.
